# Supplementary material
Source: PubMed Central journal article supplement (PMC5940498)
Supplement: NIHMS952435-supplement-1.pdf [file NIHMS952435-supplement-1.pdf]

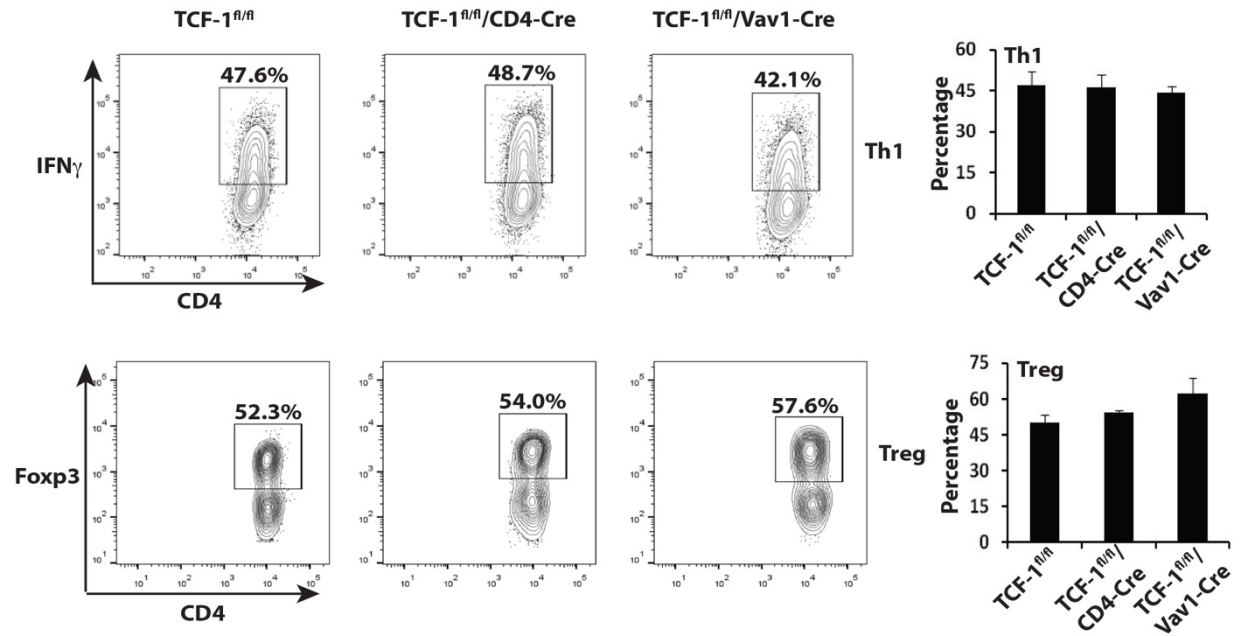

Figure S1. Vav1-Cre induced TCF-1 deletion does not affect Th1 and Treg differentiation. Percentage of IFN- $\gamma$ + /CD4+ (top) or FOXP3+ /CD4+ (bottom) cells among indicated genotypes of naïve CD4+ T cells stimulated under Th1 (top) or Treg (bottom) priming conditions, as determined by flow cytometry analysis. Right panels are quantification results of three biological replica.

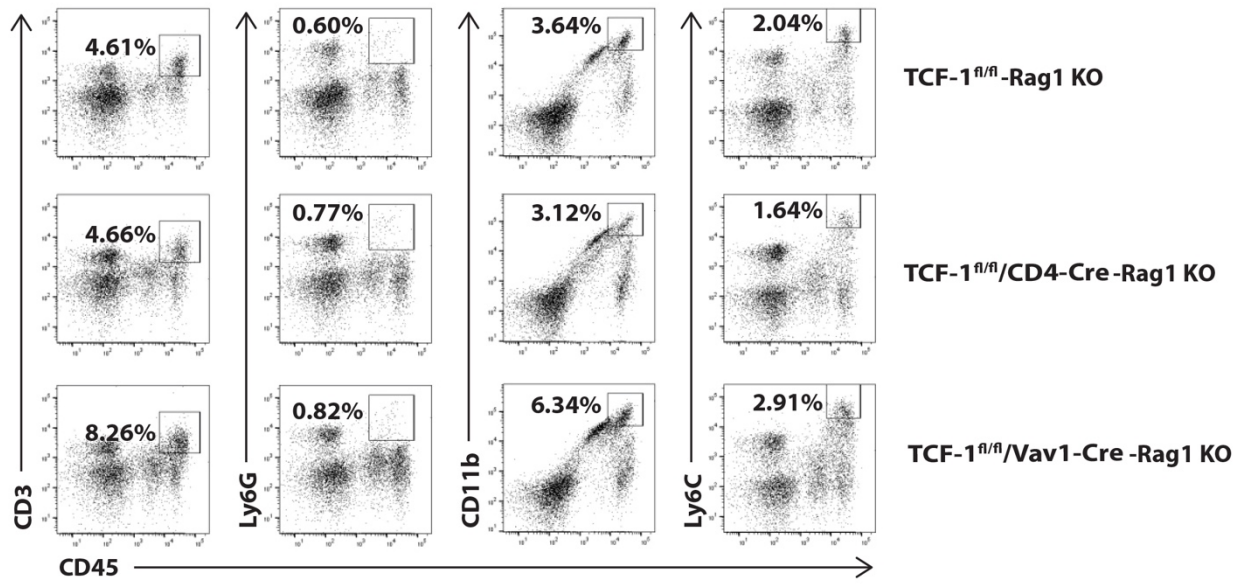

Figure S2. Gating strategy for flow cytometric analysis of CNS infiltrated lymphocytes (CD45+) at the peak of the Th17-mediated EAE in mice as described in Fig. 2C.
